# Supplementary material for: Characterization and Salt Response in Recurrent Halotolerant Exiguobacterium sp. SH31 Isolated From Sediments of Salar de Huasco, Chilean Altiplano
Source: Front Microbiol. 2018 Sep 20;9:2228. doi: 10.3389/fmicb.2018.02228 (PMC6158405; doi:10.3389/fmicb.2018.02228)
Supplement: Supplementary file 8 [file Table_6.xlsx]

## Sheet: Hoja1
Supplementary Table S6. Gene expression values, after relative expression analysis shown as fold change ratio.
	0 g/l NaCl		25 g/l NaCl		50 g/l NaCl
Gene	Mean FC	SD	Mean FC	SD	Mean FC	SD
opuBA	1.00151	0.0667106	8.72277	0.985123	2.79709	0.592881
putP	1.01866	0.231337	51.4354	3.69098	55.1974	10.2817
glnA	1.0606	0.451936	7.9341	1.14529	1.25263	0.187028
proC	1.00011	0.0880656	13.9486	2.23956	3.89922	0.0909736
gltA	1.07471	0.443034	33.9724	1.11098	12.4143	2.2379
fliG	1.04258	0.343229	0.976911	0.0916163	5.5524	0.627502
fliS	1.0354	0.341312	20.572	2.55631	11.4346	1.2001
ywqC	1.0025	0.0874477	0.629771	0.105623	1.10826	0.0820418
bdlA	1.07133	0.473986	2.86947	0.195335	7.68631	0.754704
luxS	1.01153	0.184023	2.80068	0.343639	3.05042	0.520115
gbsA	1.00315	0.0990661	16.8249	0.24334	47.3568	4.70783
pgaC	1.0233	0.279431	7.22822	0.715139	16.8898	1.2511
